# Supplementary material
Source: publisher site journal article supplement (https://www.dovepress.com/get_supplementary_file.php?f=330783.xlsx)
Supplement: Supplementary file 1 [file get_supplementary_file.php]

## Sheet: Sheet1
A calculator for calculating the probability of the occurrence of intra-spinal canal cement leakage among elderly patients with spine metastasis treating with percutaneous vertebroplasty
Variables	Values
Sex (Male=1; Female=2)	2
Cortical osteolytic destruction in posterior wall (Yes=1; No=0)	1
Load-bearing lines of spine (Normal=0; Abnormal=1)	0
	0.304221
The predicted probability of the occurrence of intra-spinal canal cement leakage	0.233259
Instructions: selecting results for each variable above using the information described in brackets.
Note: For research only,not for clinical strategy decision
